**Table S1.** Carbonate chemistry and physiological parameters for *G. oceanica*

| Temp.<br>(°C) | CO <sub>2</sub><br>(μmol kg <sup>-1</sup> ) | p CO <sub>2ave</sub><br>(μatm) | TA <sub>ave</sub><br>(μmol kg <sup>-1</sup> ) | DIC <sub>ave</sub><br>(μmol kg <sup>-1</sup> ) | pH <sub>free</sub> | Ω Ca  | μ<br>(d <sup>-1</sup> ) | POC production<br>(pg C cell <sup>-1</sup> d <sup>-1</sup> ) | Calcification<br>(pg C cell <sup>-1</sup> d <sup>-1</sup> ) | PIC:POC |
|---------------|---------------------------------------------|--------------------------------|-----------------------------------------------|------------------------------------------------|--------------------|-------|-------------------------|--------------------------------------------------------------|-------------------------------------------------------------|---------|
| 15            | 0.9                                         | 24                             | 2330.7                                        | 1456.0                                         | 8.93               | 14.08 | 0.13                    | 1.72                                                         | 3.71                                                        | 2.16    |
|               | 2.2                                         | 59                             | 2301.8                                        | 1637.2                                         | 8.68               | 10.76 | 0.41                    | 4.32                                                         | 10.53                                                       | 2.44    |
|               | 4.1                                         | 110                            | 2275.8                                        | 1765.5                                         | 8.49               | 8.29  | 0.61                    | 5.68                                                         | 11.68                                                       | 2.05    |
|               | 10.7                                        | 286                            | 2313.6                                        | 2010.5                                         | 8.17               | 5.08  | 0.66                    | 8.22                                                         | 15.75                                                       | 1.92    |
|               | 16.0                                        | 430                            | 2284.9                                        | 2065.8                                         | 8.02               | 3.79  | 0.62                    | 9.52                                                         | 14.45                                                       | 1.52    |
|               | 21.9                                        | 588                            | 2295.4                                        | 2128.6                                         | 7.91               | 3.03  | 0.57                    | 8.05                                                         | 12.23                                                       | 1.52    |
|               | 28.8                                        | 773                            | 2286.8                                        | 2163.7                                         | 7.80               | 2.43  | 0.44                    | 6.78                                                         | 9.35                                                        | 1.38    |
|               | 36.5                                        | 977                            | 2297.0                                        | 2206.5                                         | 7.71               | 2.02  | 0.33                    | 5.07                                                         | 5.97                                                        | 1.18    |
|               | 45.1                                        | 1209                           | 2289.7                                        | 2228.6                                         | 7.62               | 1.69  | 0.25                    | 5.35                                                         | 4.41                                                        | 0.82    |
|               | 47.1                                        | 1261                           | 2342.8                                        | 2283.8                                         | 7.61               | 1.69  | 0.35                    | 5.33                                                         | 7.11                                                        | 1.21    |
|               | 50.3                                        | 1348                           | 2365.9                                        | 2314.5                                         | 7.59               | 1.63  | 0.39                    | 5.63                                                         | 6.71                                                        | 1.31    |
|               | 87.0                                        | 2331                           | 2281.2                                        | 2308.0                                         | 7.35               | 0.93  | 0.13                    | 2.94                                                         | 2.70                                                        | 0.92    |
| 20            | 0.8                                         | 25                             | 2339.8                                        | 1420.8                                         | 8.90               | 14.83 | 0.29                    | 5.58                                                         | 6.60                                                        | 1.18    |
|               | 1.9                                         | 59                             | 2295.6                                        | 1580.7                                         | 8.66               | 11.64 | 0.54                    | 6.16                                                         | 13.37                                                       | 2.17    |
|               | 3.5                                         | 108                            | 2287.9                                        | 1718.6                                         | 8.48               | 9.35  | 0.82                    | 12.18                                                        | 24.58                                                       | 2.02    |
|               | 9.0                                         | 280                            | 2290.6                                        | 1941.7                                         | 8.17               | 5.88  | 1.00                    | 14.34                                                        | 26.03                                                       | 1.81    |
|               | 13.3                                        | 413                            | 2280.4                                        | 2014.3                                         | 8.04               | 4.58  | 1.06                    | 12.17                                                        | 21.00                                                       | 1.73    |
|               | 18.5                                        | 574                            | 2268.5                                        | 2065.5                                         | 7.91               | 3.63  | 1.05                    | 12.74                                                        | 20.26                                                       | 1.59    |
|               | 24.7                                        | 764                            | 2278.2                                        | 2122.5                                         | 7.81               | 2.95  | 0.88                    | 16.68                                                        | 19.71                                                       | 1.18    |
|               | 30.3                                        | 940                            | 2308.6                                        | 2181.9                                         | 7.73               | 2.57  | 0.79                    | 13.74                                                        | 15.88                                                       | 1.16    |
|               | 39.3                                        | 1216                           | 2296.1                                        | 2208.8                                         | 7.63               | 2.06  | 0.58                    | 8.95                                                         | 8.99                                                        | 1.00    |
|               | 47.7                                        | 1476                           | 2307.1                                        | 2246.1                                         | 7.55               | 1.77  | 0.51                    | 8.16                                                         | 8.09                                                        | 0.99    |
|               | 57.5                                        | 1781                           | 2302.7                                        | 2267.8                                         | 7.48               | 1.50  | 0.44                    | 7.13                                                         | 6.00                                                        | 0.84    |
|               | 68.0                                        | 2104                           | 2313.7                                        | 2301.1                                         | 7.41               | 1.30  | 0.36                    | 7.63                                                         | 7.76                                                        | 1.02    |
| 25            | 0.7                                         | 26                             | 2261.9                                        | 1335.1                                         | 8.85               | 14.72 | 0.21                    | 1.54                                                         | 1.71                                                        | 0.10    |
|               | 1.7                                         | 58                             | 2385.3                                        | 1583.1                                         | 8.65               | 13.25 | 0.47                    | 4.05                                                         | 7.47                                                        | 0.31    |
|               | 8.1                                         | 288                            | 2267.2                                        | 1883.0                                         | 8.15               | 6.50  | 1.13                    | 14.32                                                        | 28.02                                                       | 2.20    |
|               | 10.7                                        | 377                            | 2212.8                                        | 1898.8                                         | 8.05               | 5.35  | 1.27                    | 15.21                                                        | 25.05                                                       | 2.84    |
|               | 14.4                                        | 509                            | 2204.2                                        | 1952.0                                         | 7.94               | 4.39  | 1.18                    | 14.28                                                        | 22.41                                                       | 3.25    |
|               | 18.0                                        | 635                            | 2215.1                                        | 2001.8                                         | 7.86               | 3.81  | 1.19                    | 12.53                                                        | 18.06                                                       | 3.29    |
|               | 20.9                                        | 740                            | 2242.5                                        | 2052.3                                         | 7.81               | 3.49  | 1.17                    | 12.41                                                        | 14.86                                                       | 3.55    |
|               | 27.7                                        | 980                            | 2264.0                                        | 2117.8                                         | 7.71               | 2.88  | 1.15                    | 12.18                                                        | 18.37                                                       | 4.23    |
|               | 36.4                                        | 1284                           | 2241.5                                        | 2138.6                                         | 7.60               | 2.29  | 0.99                    | 14.53                                                        | 18.99                                                       | 6.35    |
|               | 49.0                                        | 1731                           | 2247.7                                        | 2187.6                                         | 7.48               | 1.79  | 0.85                    | 11.25                                                        | 12.02                                                       | 6.29    |
|               | 58.5                                        | 2067                           | 2227.0                                        | 2192.6                                         | 7.41               | 1.52  | 0.61                    | 10.96                                                        | 10.43                                                       | 7.20    |
|               | 99.5                                        | 3517                           | 2017.7                                        | 2067.3                                         | 7.15               | 0.78  | 0.69                    | 10.44                                                        | 10.65                                                       | 13.43   |
